# Supplementary material for: Short-Term Magnesium Therapy Alleviates Moderate Stress in Patients with Fibromyalgia: A Randomized Double-Blind Clinical Trial
Source: MDPI journal article supplement (doi:10.3390/nu14102088), 2022-05-17
Supplement: s1 [file s1]

Supplemental data table S1 – secondary outcomes

**Medical history of patients (part I)**

|                  |                                                                  | <b>Mg<br/>percent</b> | <b>Placebo<br/>percent</b> |
|------------------|------------------------------------------------------------------|-----------------------|----------------------------|
| Cardiovascular   | hypertension                                                     | 19                    | 13                         |
|                  | cardiac arrhythmias                                              | 8                     | 5                          |
|                  | raynaud's disease                                                | 0                     | 5                          |
|                  | surgery (varicose, saphenectomy)                                 | 8                     | 11                         |
|                  | dyslipidemia                                                     | 8                     | 9                          |
| Respiratory      | asthma                                                           | 11                    | 8                          |
|                  | chronic bronchitis                                               | 6                     | 0                          |
|                  | histiocytosis                                                    | 3                     | 3                          |
|                  | pulmonary embolism                                               | 3                     | 0                          |
|                  | COPD                                                             | 8                     | 0                          |
|                  | pneumonia                                                        | 3                     | 0                          |
| Gastrointestinal | bloating                                                         | 0                     | 3                          |
|                  | constipation                                                     | 11                    | 3                          |
|                  | gastroesophageal reflux                                          | 14                    | 6                          |
|                  | hemorrhoids crisis                                               | 0                     | 5                          |
|                  | hiatus hernia                                                    | 8                     | 5                          |
|                  | irritable bowel syndrome                                         | 5                     | 21                         |
|                  | sigmoiditis                                                      | 3                     | 0                          |
|                  | surgery (appendectomy, polyps, cholecystectomy, inguinal hernia) | 47                    | 77                         |
| Hepatic          | hepatic angioma                                                  | 3                     | 0                          |
|                  | hepatitis                                                        | 3                     | 3                          |
|                  | hepatic cytolysis                                                | 3                     | 0                          |
| Urology          | bladder surgery                                                  | 3                     | 0                          |
|                  | cystitis                                                         | 0                     | 5                          |
|                  | hyperuricemia                                                    | 3                     | 0                          |
|                  | pyelonephritis                                                   | 3                     | 8                          |
|                  | renal colic                                                      | 0                     | 3                          |
|                  | urinary incontinence                                             | 3                     | 0                          |
|                  | vesical renal reflux                                             | 3                     | 0                          |

Supplemental data table S1 – secondary outcomes

**Medical history of patients (part II)**

|                             |                                                                             | <b>Mg<br/>percent</b> | <b>Placebo<br/>percent</b> |
|-----------------------------|-----------------------------------------------------------------------------|-----------------------|----------------------------|
| Neurologic<br>Psychiatric   | anorexia                                                                    | 0                     | 3                          |
|                             | anxiety                                                                     | 8                     | 3                          |
|                             | balance problems                                                            | 0                     | 3                          |
|                             | bipolar disorders                                                           | 5                     | 0                          |
|                             | cruralgia                                                                   | 3                     | 0                          |
|                             | depressive syndrom                                                          | 16                    | 32                         |
|                             | encephalitis                                                                | 3                     | 0                          |
|                             | headache                                                                    | 3                     | 0                          |
|                             | insomnia                                                                    | 3                     | 0                          |
|                             | ischemic stroke                                                             | 0                     | 3                          |
|                             | migraine                                                                    | 8                     | 13                         |
|                             | mysathenia                                                                  | 3                     | 0                          |
|                             | neuropathic pain                                                            | 9                     | 3                          |
|                             | sciatica                                                                    | 0                     | 6                          |
| Genital                     | breast cancer surgery                                                       | 6                     | 0                          |
|                             | endometriosis                                                               | 14                    | 3                          |
|                             | papillomavirus infection                                                    | 0                     | 3                          |
|                             | salpingitis                                                                 | 5                     | 3                          |
|                             | surgery(breast and ovarian cyst, hysterectomy, ovariectomy                  | 30                    | 25                         |
| Rheumatologic               | algodystrophy                                                               | 6                     | 3                          |
|                             | arthrosis                                                                   | 5                     | 13                         |
|                             | disc herniation                                                             | 14                    | 8                          |
|                             | Inflammatory diseases (polyarthritis, acute rheumatism crisis, spondylitis) | 6                     | 3                          |
|                             | osteoporosis                                                                | 3                     | 3                          |
|                             | scheuermann disease                                                         | 0                     | 3                          |
|                             | scoliosis                                                                   | 3                     | 0                          |
|                             | surgery (arm, wrist, carpal tunnel)                                         | 16                    | 8                          |
| Endocrinology<br>Hematology | hodglin's lymphoma                                                          | 3                     | 0                          |
|                             | hyperthyroidism                                                             | 0                     | 3                          |
|                             | hypocalcemia                                                                | 3                     | 0                          |
|                             | hypothyroidism                                                              | 32                    | 24                         |
|                             | sepsis                                                                      | 3                     | 0                          |
|                             | thyroid nodules                                                             | 5                     | 3                          |

Supplemental data table S1 – secondary outcomes

**Concomitants medications of patients at inclusion**

| <b>Class of treatment</b> | <b>Mg<br/>percent</b> | <b>Placebo<br/>percent</b> |
|---------------------------|-----------------------|----------------------------|
| High blood pressure       | 16.2                  | 10.5                       |
| Statins                   | 5.4                   | 5.3                        |
| Calcium chanel blokera    | 10.8                  | 2.6                        |
| Steroids                  | 29.7                  | 31.6                       |
| Laxatives                 | 13.5                  | 10.5                       |
| Proton pump inhibitors    | 18.9                  | 23.7                       |
| WHO level I analgesics    | 40.5                  | 55.3                       |
| WHO level II analgesics   | 59.5                  | 42.1                       |
| WHO level III analgesics  | 5.4                   | 5.3                        |
| Co-analgesics             | 13.5                  | 21.1                       |
| Antidepressants           | 54.1                  | 42.1                       |
| Antiepileptics            | 8.1                   | 13.2                       |
| Hypnotics                 | 8.1                   | 23.7                       |
| Anxiolytics               | 37.8                  | 29.0                       |

Supplemental data table S1 – secondary outcomes

**Pain parameters and fibromyalgia specific questionnaires**

|                                                        | All patients |           |       | Patients with mild/moderate (m/M) score at inclusion |           |       | Patients with severe/extremely severe (S/S+) score at inclusion |           |       |
|--------------------------------------------------------|--------------|-----------|-------|------------------------------------------------------|-----------|-------|-----------------------------------------------------------------|-----------|-------|
| Parameters                                             | Mg           | Placebo   | p     | Mg                                                   | Placebo   | p     | Mg                                                              | Placebo   | p     |
| <b>Pain (numerical scale) (0-10)</b>                   |              |           |       |                                                      |           |       |                                                                 |           |       |
| INCLUSION                                              | 6.0±1.8      | 6.4±1.5   | /     | 6.1±1.9                                              | 6.4±1.1   | /     | 6.0±1.8                                                         | 6.4±1.5   | /     |
| D0                                                     | 5.6±1.8      | 5.9±1.9   | 0.892 | 6.4±1.9                                              | 5.9±1.3   | 0.256 | 5.3±1.6                                                         | 5.9±2.0   | 0.672 |
| D28                                                    | 4.5±1.6      | 4.8±2.3   | 0.949 | 4.6±1.7                                              | 5.4±1.7   | 0.392 | 4.4±1.6                                                         | 4.7±2.4   | 0.693 |
| D84                                                    | 5.2±2.0      | 5.6±2.0   | 0.908 | 5.4±1.5                                              | 6.3±1.3   | 0.417 | 5.2±2.2                                                         | 5.4±2.2   | 0.693 |
| <b>Fibromyalgia Impact Questionnaire (FIQ) (0-100)</b> |              |           |       |                                                      |           |       |                                                                 |           |       |
| D0                                                     | 59.7±10.7    | 62.3±14.5 | /     | 59.2±7.5                                             | 62.7±15.1 | /     | 59.9±11.7                                                       | 62.2±14.6 | /     |
| D28                                                    | 55.7±12.5    | 53.1±19.7 | 0.048 | 52.4±12.8                                            | 56.4±15.6 | 0.936 | 56.8±12.4                                                       | 52.3±20.7 | 0.026 |
| D84                                                    | 57.4±12.8    | 57.5±16.2 | 0.345 | 57.7±11.2                                            | 62.3±15.7 | 0.824 | 57.3±13.5                                                       | 56.4±16.3 | 0.288 |
| <b>Brief Pain Inventory (BPI) (0-10)</b>               |              |           |       |                                                      |           |       |                                                                 |           |       |
| <i>Pain severity</i>                                   |              |           |       |                                                      |           |       |                                                                 |           |       |
| D0                                                     | 5.4±1.2      | 5.7±1.2   | /     | 5.7±1.3                                              | 5.3±0.7   | /     | 5.3±1.2                                                         | 5.8±1.3   | /     |
| D28                                                    | 5.0±1.6      | 5.1±1.8   | 0.545 | 5.1±1.7                                              | 5.6±1.2   | 0.029 | 4.9±1.6                                                         | 5.1±1.9   | 0.169 |
| D84                                                    | 5.4±1.5      | 5.6±1.7   | 0.746 | 5.8±1.0                                              | 6.2±1.3   | 0.066 | 5.2±1.5                                                         | 5.5±1.8   | 0.396 |
| <b>Brief Pain Inventory (BPI) (0-10)</b>               |              |           |       |                                                      |           |       |                                                                 |           |       |
| <i>Pain interference</i>                               |              |           |       |                                                      |           |       |                                                                 |           |       |
| D0                                                     | 5.8±1.7      | 5.9±2.1   | /     | 5.2±2.0                                              | 5.3±2.0   | /     | 6.0±1.6                                                         | 6.0±2.1   | /     |
| D28                                                    | 5.4±1.8      | 5.1±2.2   | 0.266 | 5.1±1.4                                              | 5.8±1.6   | 0.297 | 5.4±1.9                                                         | 5.0±2.3   | 0.152 |
| D84                                                    | 5.6±1.7      | 5.3±2.0   | 0.289 | 5.7±1.5                                              | 5.8±1.7   | 0.942 | 5.5±1.7                                                         | 5.2±2.1   | 0.357 |
| <b>Brief Pain Inventory (BPI) (0-10)</b>               |              |           |       |                                                      |           |       |                                                                 |           |       |
| <i>Pain Experience</i>                                 |              |           |       |                                                      |           |       |                                                                 |           |       |
| D0                                                     | 5.6±1.2      | 5.8±1.3   | /     | 5.3±1.3                                              | 5.3±1.0   | /     | 5.7±1.1                                                         | 5.9±1.4   | /     |
| D28                                                    | 5.2±1.5      | 5.1±1.8   | 0.323 | 5.1±1.4                                              | 5.7±1.2   | 0.068 | 5.2±1.6                                                         | 5.0±1.9   | 0.114 |
| D84                                                    | 5.5±1.3      | 5.5±1.7   | 0.450 | 5.8±0.9                                              | 6.0±1.3   | 0.361 | 5.4±1.4                                                         | 5.4±1.7   | 0.354 |

**Sleep quality questionnaire (part I)**

|                                                                                       | All patients |          |       | Patients with mild/moderate (m/M) score at inclusion |          |       | Patients with severe/extremely severe (S/S+) score at inclusion |          |       |
|---------------------------------------------------------------------------------------|--------------|----------|-------|------------------------------------------------------|----------|-------|-----------------------------------------------------------------|----------|-------|
| Parameters                                                                            | Mg           | Placebo  | p     | Mg                                                   | Placebo  | p     | Mg                                                              | Placebo  | p     |
| <b>Pittsburgh Sleep Quality Index (PSQI) (0-21)</b><br><i>Global score</i>            |              |          |       |                                                      |          |       |                                                                 |          |       |
| D0                                                                                    | 11.5±3.2     | 13.8±3.2 | /     | 10.8±3.1                                             | 14.3±2.9 | /     | 11.7±3.3                                                        | 13.7±3.3 | /     |
| D28                                                                                   | 11.4±3.5     | 12.5±3.3 | 0.052 | 9.8±1.9                                              | 13.3±2.3 | 1     | 11.9±3.7                                                        | 12.4±3.5 | 0.026 |
| D84                                                                                   | 11.9±3.2     | 12.7±3.9 | 0.023 | 11.8±2.9                                             | 12.6±3.6 | 0.014 | 11.9±3.4                                                        | 12.7±4.0 | 0.158 |
| <b>Pittsburgh Sleep Quality Index (PSQI) (0-3)</b><br><i>Subjective sleep quality</i> |              |          |       |                                                      |          |       |                                                                 |          |       |
| D0                                                                                    | 2.1±0.7      | 2.2±0.7  | /     | 2.3±0.7                                              | 2.0±0.0  | /     | 2.0±0.7                                                         | 2.3±0.7  | /     |
| D28                                                                                   | 2.1±0.6      | 2.1±0.7  | 0.552 | 2.2±0.4                                              | 2.0±0.0  | 0.696 | 2.0±0.7                                                         | 2.1±0.8  | 0.407 |
| D84                                                                                   | 2.2±0.7      | 2.2±0.7  | 0.522 | 2.4±0.5                                              | 2.0±0.8  | 0.696 | 2.1±0.8                                                         | 2.3±0.7  | 0.613 |
| <b>Pittsburgh Sleep Quality Index (PSQI) (0-3)</b><br><i>Sleep latency</i>            |              |          |       |                                                      |          |       |                                                                 |          |       |
| D0                                                                                    | 2.1±0.9      | 2.4±0.8  | /     | 1.8±1.0                                              | 2.0±0.8  | /     | 2.2±0.9                                                         | 2.5±0.8  | /     |
| D28                                                                                   | 1.9±1.0      | 2.0±1.0  | 0.324 | 1.2±1.0                                              | 1.4±0.5  | 0.970 | 2.1±0.9                                                         | 2.1±1.0  | 0.217 |
| D84                                                                                   | 2.1±0.9      | 2.2±1.0  | 0.375 | 1.6±1.0                                              | 1.9±0.9  | 0.852 | 2.1±0.8                                                         | 2.2±1.0  | 0.254 |
| <b>Pittsburgh Sleep Quality Index (PSQI) (0-3)</b><br><i>Sleep duration</i>           |              |          |       |                                                      |          |       |                                                                 |          |       |
| D0                                                                                    | 1.2±0.9      | 1.8±0.9  | /     | 1.3±1.3                                              | 1.9±1.1  | /     | 1.1±0.8                                                         | 1.7±0.9  | /     |
| D28                                                                                   | 1.2±0.8      | 1.6±0.9  | 0.169 | 1.2±1.0                                              | 1.9±1.2  | 0.711 | 1.2±0.8                                                         | 1.5±0.8  | 0.092 |
| D84                                                                                   | 1.2±0.9      | 1.7±1.0  | 0.621 | 1.1±1.1                                              | 1.7±1.4  | 0.792 | 1.2±0.9                                                         | 1.6±1.0  | 0.463 |
| <b>Pittsburgh Sleep Quality Index (PSQI) (0-3)</b><br><i>Sleep efficiency</i>         |              |          |       |                                                      |          |       |                                                                 |          |       |
| D0                                                                                    | 1.3±1.2      | 2.0±1.1  | /     | 1.2±1.3                                              | 2.0±1.4  | /     | 1.3±1.2                                                         | 2.0±1.1  | /     |
| D28                                                                                   | 1.1±1.2      | 2.0±1.1  | 0.595 | 0.6±1.0                                              | 2.1±1.2  | 0.117 | 1.3±1.2                                                         | 2.0±1.1  | 0.788 |
| D84                                                                                   | 1.2±1.3      | 1.9±1.3  | 0.956 | 1.2±1.5                                              | 1.6±1.5  | 0.406 | 1.1±1.2                                                         | 1.9±1.3  | 0.737 |

**Sleep quality questionnaire (part II)**

Supplemental data table S1 – secondary outcomes

|                                                                                      | All patients |         |       | Patients with mild/moderate (m/M) score at inclusion |         |       | Patients with severe/extremely severe (S/S+) score at inclusion |         |        |
|--------------------------------------------------------------------------------------|--------------|---------|-------|------------------------------------------------------|---------|-------|-----------------------------------------------------------------|---------|--------|
| Parameters                                                                           | Mg           | Placebo | p     | Mg                                                   | Placebo | p     | Mg                                                              | Placebo | p      |
| <b>Pittsburgh Sleep Quality Index (PSQI) (0-3)</b><br><i>Sleep disturbance</i>       |              |         |       |                                                      |         |       |                                                                 |         |        |
| D0                                                                                   | 2.2±0.6      | 2.1±0.5 | /     | 2.0±0.5                                              | 2.1±0.4 | /     | 2.2±0.6                                                         | 2.0±0.5 | /      |
| D28                                                                                  | 2.1±0.5      | 2.0±0.6 | 0.708 | 2.1±0.6                                              | 2.0±0.6 | 0.222 | 2.1±0.5                                                         | 2.0±0.6 | 0.892  |
| D84                                                                                  | 2.3±0.5      | 2.0±0.5 | 0.428 | 2.3±0.5                                              | 2.1±0.4 | 0.109 | 2.2±0.5                                                         | 2.0±0.5 | 0.942  |
| <b>Pittsburgh Sleep Quality Index (PSQI) (0-3)</b><br><i>Use of sleep medication</i> |              |         |       |                                                      |         |       |                                                                 |         |        |
| D0                                                                                   | 1.2±1.4      | 1.5±1.5 | /     | 1.0±1.5                                              | 2.1±1.5 | /     | 1.2±1.4                                                         | 1.3±1.4 | /      |
| D28                                                                                  | 1.3±1.5      | 1.2±1.4 | 0.079 | 1.0±1.5                                              | 1.9±1.3 | 0.384 | 1.4±1.4                                                         | 1.1±1.4 | 0.0112 |
| D84                                                                                  | 1.4±1.3      | 1.1±1.4 | 0.005 | 1.1±1.5                                              | 1.6±1.5 | 0.038 | 1.5±1.3                                                         | 1.0±1.4 | 0.022  |
| <b>Pittsburgh Sleep Quality Index (PSQI) (0-3)</b><br><i>Daytime dysfunction</i>     |              |         |       |                                                      |         |       |                                                                 |         |        |
| D0                                                                                   | 1.5±0.8      | 1.9±0.8 | /     | 1.1±0.8                                              | 2.1±0.9 | /     | 1.7±0.8                                                         | 1.9±0.8 | /      |
| D28                                                                                  | 1.7±0.7      | 1.7±0.9 | 0.019 | 1.4±0.5                                              | 2.0±0.8 | 0.191 | 1.8±0.7                                                         | 1.6±0.9 | 0.041  |
| D84                                                                                  | 1.7±0.7      | 1.7±0.9 | 0.085 | 2.0±0.7                                              | 1.7±0.8 | 0.000 | 1.6±0.6                                                         | 1.7±0.9 | 0.978  |

Supplemental data table S1 – secondary outcomes

**Quality of life and fatigue questionnaire**

|                                                        | All patients |           |       | Patients with mild/moderate (m/M) score at inclusion |           |       | Patients with severe/extremely severe (S/S+) score at inclusion |           |       |
|--------------------------------------------------------|--------------|-----------|-------|------------------------------------------------------|-----------|-------|-----------------------------------------------------------------|-----------|-------|
| Parameters                                             | Mg           | Placebo   | p     | Mg                                                   | Placebo   | p     | Mg                                                              | Placebo   | p     |
| <b>Quality of life – short form 12 (SF-12) (0-100)</b> |              |           |       |                                                      |           |       |                                                                 |           |       |
| <i>Mental score</i>                                    |              |           |       |                                                      |           |       |                                                                 |           |       |
| D0                                                     | 31.6±6.2     | 33.0±9.3  | /     | 32.5±5.3                                             | 35.4±13.9 | /     | 31.3±6.5                                                        | 32.5±8.1  | /     |
| D28                                                    | 33.8±7.2     | 34.9±9.8  | 0.930 | 36.3±7.5                                             | 36.7±12.0 | 0.380 | 33.0±7.1                                                        | 34.5±9.4  | 0.735 |
| D84                                                    | 33.2±7.0     | 35.7±9.3  | 0.483 | 34.8±7.1                                             | 37.3±12.2 | 0.883 | 32.7±7.1                                                        | 35.3±8.7  | 0.403 |
| <b>Quality of life – short form 12 (SF-12) (0-100)</b> |              |           |       |                                                      |           |       |                                                                 |           |       |
| <i>Physical score</i>                                  |              |           |       |                                                      |           |       |                                                                 |           |       |
| D0                                                     | 30.9±5.8     | 30.7±5.7  | /     | 30.2±6.0                                             | 28.5±4.2  | /     | 31.2±5.8                                                        | 31.2±5.9  | /     |
| D28                                                    | 31.8±5.7     | 31.1±6.8  | 0.589 | 29.5±5.1                                             | 27.9±3.9  | 0.980 | 32.5±5.8                                                        | 31.8±7.2  | 0.459 |
| D84                                                    | 32.0±5.9     | 31.0±6.1  | 0.381 | 28.3±6.2                                             | 29.7±3.3  | 0.108 | 33.3±5.3                                                        | 31.3±6.6  | 0.056 |
| <b>Fatigue Severity Scale (FSS) (9-63)</b>             |              |           |       |                                                      |           |       |                                                                 |           |       |
| D0                                                     | 51.9±10.3    | 50.0±12.0 | /     | 51.3±7.8                                             | 51.9±10.8 | /     | 52.1±11.1                                                       | 49.6±12.4 | /     |
| D28                                                    | 49.9±12.2    | 47.2±13.1 | 0.348 | 49.7±6.3                                             | 50.7±11.2 | 0.816 | 50.0±13.6                                                       | 46.3±13.5 | 0.305 |
| D84                                                    | 50.1±11.1    | 48.4±12.9 | 0.536 | 49.3±9.2                                             | 50.4±12.6 | 0.843 | 50.4±11.8                                                       | 47.9±13.2 | 0.458 |

Supplemental data table S1 – secondary outcomes

**Catastrophising and precariousness scales**

|                                                                        | All patients |           |       | Patients with mild/moderate (m/M) score at inclusion |           |       | Patients with severe/extremely severe (S/S+) score at inclusion |           |       |
|------------------------------------------------------------------------|--------------|-----------|-------|------------------------------------------------------|-----------|-------|-----------------------------------------------------------------|-----------|-------|
| Parameters                                                             | Mg           | Placebo   | p     | Mg                                                   | Placebo   | p     | Mg                                                              | Placebo   | p     |
| <b>Pain Catastrophising Scale (PCS) (0-52)</b><br><i>Total</i>         |              |           |       |                                                      |           |       |                                                                 |           |       |
| D0                                                                     | 29.7±10.5    | 28.9±13.1 | /     | 30.3±7.3                                             | 27.1±11.6 | /     | 29.5±11.4                                                       | 29.3±13.5 | /     |
| D28                                                                    | 27.5±12.7    | 27.2±13.1 | 0.654 | 28.1±11.1                                            | 26.1±12.7 | 0.509 | 27.3±13.4                                                       | 27.4±13.3 | 0.896 |
| D84                                                                    | 27.1±13.2    | 26.1±14.2 | 0.877 | 29.1±10.7                                            | 26.9±10.7 | 0.557 | 26.4±14.0                                                       | 26.0±15.0 | 0.924 |
| <b>Pain Catastrophising Scale (PCS) (0-16)</b><br><i>Rumination</i>    |              |           |       |                                                      |           |       |                                                                 |           |       |
| D0                                                                     | 9.3±4.1      | 8.6±4.9   | /     | 9.8±2.7                                              | 8.3±4.4   | /     | 9.1±4.4                                                         | 8.7±5.1   | /     |
| D28                                                                    | 9.1±4.4      | 8.2±4.5   | 0.849 | 10.1±3.3                                             | 8.4±4.3   | 0.859 | 8.7±4.7                                                         | 8.1±4.6   | 0.794 |
| D84                                                                    | 8.9±4.8      | 8.4±4.5   | 0.750 | 9.8±4.1                                              | 9.7±3.3   | 0.218 | 8.6±5.1                                                         | 8.1±4.8   | 0.864 |
| <b>Pain Catastrophising Scale (PCS) (0-12)</b><br><i>Magnification</i> |              |           |       |                                                      |           |       |                                                                 |           |       |
| D0                                                                     | 5.3±2.8      | 6.1±3.5   | /     | 4.9±2.5                                              | 6.1±2.9   | /     | 5.4±2.9                                                         | 6.1±3.7   | /     |
| D28                                                                    | 4.8±3.5      | 5.5±3.3   | 0.938 | 3.9±2.9                                              | 5.3±3.7   | 0.589 | 5.0±3.7                                                         | 5.5±3.3   | 0.737 |
| D84                                                                    | 4.7±3.5      | 4.9±3.4   | 0.384 | 4.6±3.1                                              | 5.3±2.8   | 0.987 | 4.8±3.6                                                         | 4.9±3.5   | 0.301 |
| <b>Pain Catastrophising Scale (PCS) (0-24)</b><br><i>Helplessness</i>  |              |           |       |                                                      |           |       |                                                                 |           |       |
| D0                                                                     | 15.2±4.9     | 14.2±6.1  | /     | 15.6±3.5                                             | 12.7±4.6  | /     | 15.0±5.3                                                        | 14.5±6.5  | /     |
| D28                                                                    | 13.6±6.1     | 13.5±6.3  | 0.356 | 14.1±5.8                                             | 12.4±5.4  | 0.415 | 13.5±6.2                                                        | 13.8±6.5  | 0.529 |
| D84                                                                    | 13.5±6.1     | 12.8±7.1  | 0.617 | 14.8±5.3                                             | 11.9±5.3  | 0.873 | 13.0±6.4                                                        | 13.0±7.5  | 0.603 |
| <b>Precariousness (EPICES) (10-75)</b>                                 |              |           |       |                                                      |           |       |                                                                 |           |       |
| D0                                                                     | 26.9±21.0    | 24.0±19.8 | /     | /                                                    | /         | /     | /                                                               | /         | /     |
| D28                                                                    | 24.7±19.7    | 23.2±20.5 | 0.079 |                                                      |           |       |                                                                 |           |       |
| D84                                                                    | 26.1±20.1    | 23.5±20.3 | 0.636 |                                                      |           |       |                                                                 |           |       |



Supplemental data table S1 – secondary outcomes

**Mg assays**

|                                | All patients |           |       | Patients with mild/moderate (m/M) score at inclusion |           |       | Patients with severe/extremely severe (S/S+) score at inclusion |           |       |
|--------------------------------|--------------|-----------|-------|------------------------------------------------------|-----------|-------|-----------------------------------------------------------------|-----------|-------|
| Parameters                     | Mg           | Placebo   | p     | Mg                                                   | Placebo   | p     | Mg                                                              | Placebo   | p     |
| <b>Serum Mg (mmol/l)</b>       |              |           |       |                                                      |           |       |                                                                 |           |       |
| INCLUSION                      | 0.92±0.08    | 0.91±0.08 | /     | 0.96±0.08                                            | 0.90±0.07 | /     | 0.91±0.07                                                       | 0.91±0.08 | /     |
| D28                            | 0.87±0.07    | 0.87±0.08 | 0.422 | 0.88±0.04                                            | 0.86±0.06 | 0.319 | 0.87±0.07                                                       | 0.87±0.09 | 0.778 |
| D84                            | 0.87±0.08    | 0.88±0.08 | 0.134 | 0.88±0.08                                            | 0.86±0.04 | 0.369 | 0.87±0.08                                                       | 0.89±0.08 | 0.292 |
| <b>Erythrocyte Mg (mmol/l)</b> |              |           |       |                                                      |           |       |                                                                 |           |       |
| INCLUSION                      | 2.86±0.32    | 2.97±0.31 | /     | 3.10±0.25                                            | 2.90±0.33 | /     | 2.79±0.31                                                       | 2.98±0.31 | /     |
| D28                            | 2.87±0.37    | 2.91±0.37 | 0.875 | 2.79±0.33                                            | 3.00±0.35 | 0.000 | 2.90±0.38                                                       | 2.89±0.39 | 0.024 |
| D84                            | 2.94±0.38    | 2.91±0.36 | 0.212 | 3.05±0.29                                            | 2.97±0.32 | 0.313 | 2.90±0.41                                                       | 2.89±0.37 | 0.031 |
